# Supplementary material for: Looking after your partner: sentinel behaviour in a socially monogamous bird
Source: PeerJ. 2013 Jun 4;1:e83. doi: 10.7717/peerj.83 (PMC3678116; doi:10.7717/peerj.83)
Supplement: Supplemental Information [file peerj-01-83-s001.xlsx]

## Sheet: Sheet1
Approach direction (front / side)	Flight distance (meters)	Focal bird sex (male / female)	Partner present (yes / no)	Conspecifics present (yes / no)	Habitat type (open / closed)	Colony size
front	0	male	no	no	closed	11
side	25	male	yes	yes	closed	5
front	16	female	yes	yes	open	17
side	0	female	no	no	open	17
front	7	male	yes	yes	open	17
side	10	female	yes	yes	open	17
front	15	female	yes	yes	closed	14
side	18	male	yes	yes	open	31
front	0	male	no	yes	open	14
side	3	male	yes	yes	closed	8
front	15	female	yes	yes	closed	11
side	0	female	no	no	closed	11
front	9	male	yes	yes	open	17
side	26	male	yes	yes	open	17
front	0	male	no	no	open	17
side	28	female	yes	yes	open	17
front	39	female	yes	yes	open	31
side	16	female	yes	yes	closed	14
front	0	male	no	no	closed	11
side	37	male	yes	yes	closed	5
front	17	male	yes	yes	open	17
side	10	female	yes	yes	open	17
front	29	female	yes	yes	open	29
side	15	female	yes	no	open	31
front	32	male	yes	yes	open	29
side	0	female	no	yes	open	29
front	0	male	no	no	open	31
side	0	female	no	no	closed	13
front	11	female	yes	yes	closed	13
side	6	male	yes	yes	closed	34
front	0	male	no	yes	closed	34
side	28	female	yes	yes	open	14
front	23	male	yes	yes	open	17
side	9	female	yes	yes	open	31
front	0	male	no	yes	closed	34
side	14	female	yes	yes	closed	34
front	11	female	yes	no	closed	34
side	16	male	yes	yes	open	34
front	0	female	no	no	closed	34
side	18	male	yes	yes	closed	34
front	17	female	yes	yes	closed	11
side	13	male	yes	yes	open	5
front	0	female	no	yes	closed	13
side	0	female	no	yes	closed	14
front	31	female	yes	yes	open	31
side	0	male	no	yes	open	13
front	0	female	no	yes	closed	14
front	21	female	yes	yes	closed	34
side	14	male	yes	yes	closed	34
front	0	male	no	yes	closed	13
side	17	male	yes	yes	closed	13
front	0	male	no	yes	closed	13
side	10	female	yes	yes	open	31
front	12	female	yes	yes	closed	34
side	10	male	yes	yes	closed	34
front	0	male	no	yes	open	34
side	12	female	yes	yes	closed	14
front	0	female	no	yes	closed	4
side	9	female	yes	yes	open	17
front	0	male	no	yes	closed	34
side	15	female	yes	yes	closed	34
front	11	male	yes	yes	closed	34
side	10	female	yes	yes	open	17
front	6	female	yes	yes	open	31
side	0	female	no	yes	open	31
front	0	male	no	yes	open	3
side	19	female	yes	yes	closed	14
front	0	male	no	yes	closed	34
side	17	female	yes	yes	open	34
front	9	female	yes	yes	open	34
side	0	female	no	yes	open	34
front	0	male	no	yes	open	34
side	7	female	no	yes	open	34
front	17	male	yes	yes	open	14
side	9	male	yes	yes	open	17
front	13	female	yes	yes	closed	13
side	10	male	yes	yes	open	31
front	9	female	yes	yes	open	31
side	0	female	no	yes	open	34
front	7	female	yes	yes	closed	13
side	8	male	yes	yes	open	34
front	0	female	no	yes	closed	34
side	0	male	no	yes	closed	15
front	8	female	yes	yes	closed	15
side	10	female	yes	yes	closed	12
front	10	male	yes	yes	closed	42
side	15	female	yes	yes	closed	15
front	8	male	yes	yes	closed	15
side	6	male	yes	yes	closed	12
front	9	female	yes	yes	open	7
side	15	female	yes	yes	open	17
front	11	female	yes	yes	closed	12
side	9	male	yes	yes	open	17
front	10	male	yes	yes	closed	42
side	9	female	yes	yes	closed	42
front	11	female	yes	yes	closed	15
side	9	male	yes	yes	closed	12
front	7	female	yes	yes	closed	12
side	13	female	yes	yes	open	17
side	7	female	yes	yes	open	31
front	9	female	yes	yes	open	42
side	16	female	yes	yes	open	42
front	10	female	yes	yes	closed	8
side	10	female	yes	yes	closed	8
front	7	male	yes	yes	closed	8
side	8	female	yes	yes	open	31
front	18	male	yes	yes	open	31
side	10	female	yes	yes	open	31
front	8	male	yes	yes	open	29
side	5	male	yes	yes	closed	16
front	11	female	yes	yes	open	29
side	11	female	yes	yes	open	39
front	9	male	yes	yes	open	39
side	6	female	yes	yes	open	39
front	9	female	yes	yes	closed	20
side	18	female	yes	yes	closed	20
front	15	male	yes	yes	closed	20
side	19	female	yes	yes	open	17
front	8	male	yes	yes	open	17
side	7	male	yes	yes	closed	39
front	5	female	yes	yes	closed	39
side	11	female	yes	yes	closed	39
front	9	male	yes	yes	closed	39
side	7	female	yes	yes	open	17
side	3	male	no	no	closed	20
front	3	female	no	yes	open	17
side	17	male	yes	yes	open	29
front	8	female	yes	yes	open	29
side	10	male	yes	yes	open	29
front	10	female	yes	yes	open	29
side	11	male	yes	yes	open	29
front	6	female	yes	yes	open	29
side	10	female	yes	no	open	17
front	8	male	yes	yes	closed	19
side	24	female	yes	yes	open	30
front	5	male	yes	yes	closed	30
side	12	female	yes	yes	open	10
front	11	female	yes	yes	closed	10
side	10	male	yes	yes	open	10
front	10	male	yes	yes	closed	19
side	9	female	yes	yes	closed	19
front	6	female	yes	yes	closed	8
side	11	male	yes	yes	closed	12
front	6	female	yes	yes	closed	12
side	16	female	yes	yes	closed	12
front	6	female	yes	yes	closed	12
side	9	male	yes	yes	closed	12
side	10	female	yes	yes	open	2
front	13	male	yes	yes	open	31
side	10	male	yes	yes	open	31
front	13	female	yes	yes	open	31
front	15	female	yes	yes	closed	8
side	11	male	yes	yes	open	29
front	9	female	yes	yes	open	31
side	10	female	yes	yes	closed	31
front	10	female	yes	yes	closed	31
side	15	male	yes	yes	closed	8
front	9	male	yes	yes	closed	8
side	10	female	yes	yes	closed	31
front	10	female	yes	yes	open	10
side	9	male	yes	yes	open	10
front	10	male	yes	yes	open	7
side	9	male	yes	yes	closed	3
front	15	female	yes	yes	open	7
side	11	female	yes	yes	open	42
front	6	female	yes	yes	open	42
front	10	female	yes	yes	closed	8
side	11	female	yes	yes	open	10
front	6	male	yes	yes	open	10
side	9	male	yes	yes	open	10
front	6	female	yes	yes	open	42
side	6	female	yes	yes	open	42
front	7	male	yes	no	closed	42
side	11	male	yes	no	closed	42
front	9	female	yes	no	closed	42
side	10	female	yes	yes	closed	42
front	8	male	yes	yes	open	42
front	9	female	yes	yes	open	8
side	10	female	yes	yes	closed	4
front	7	female	yes	yes	open	42
side	12	female	yes	yes	open	42
front	13	male	yes	yes	open	42
side	9	female	yes	yes	open	42
front	9	male	yes	yes	closed	42
side	9	female	yes	yes	open	42
side	7	male	yes	yes	closed	42
front	13	male	yes	yes	open	42
side	12	female	yes	yes	closed	42
front	4	female	yes	yes	open	42
side	7	male	yes	yes	open	42
front	8	female	yes	yes	open	7
side	8	male	yes	yes	closed	42
front	10	male	yes	yes	closed	42
side	11	male	yes	yes	open	8
front	9	female	yes	yes	open	8
